# Supplementary material for: Management of a Dutch resident barnacle goose Branta leucopsis population: How can results from counts, ringing and hunting bag statistics be reconciled?
Source: PubMed Central journal article supplement (PMC5316331; doi:10.1007/s13280-017-0900-3), 2017-02-18
Supplement: 13280_2017_900_MOESM1_ESM.pdf [file 13280_2017_900_MOESM1_ESM.pdf]

*Ambio*

Electronic Supplementary Material

This supplementary material has not been peer-reviewed

Title: **Management of a Dutch resident barnacle goose *Branta leucopsis* population: How can results from counts, ringing and hunting bag statistics be reconciled?**

Authors: Henk P. van der Jeugd, Anne Kwak

**Table S1** Number of nests counted in ten barnacle goose colonies in the northern Delta area in 2004-2014, including the authority. Numbers in last column refer to remarks below the table.

| <b>Colony name</b>                                | <b>2004</b> | <b>2005</b> | <b>2006</b> | <b>2007</b> | <b>2008</b> | <b>2009</b> | <b>2010</b> | <b>2011</b> | <b>2012</b> | <b>2013</b> | <b>2014</b> | <b>Authority</b>          |
|---------------------------------------------------|-------------|-------------|-------------|-------------|-------------|-------------|-------------|-------------|-------------|-------------|-------------|---------------------------|
| Slijkplaat, Haringvliet                           | 714         | 935         | 1447        | 1112        | 1288        | 1518        | 1593        | 1378        | 1330        | 988         | 1023        | DPM                       |
| Scheelhoek eilanden                               | 305         | 366         | 567         | 355         | 410         | 573         | 511         | 480         | 411         | 398         | 293         | DPM                       |
| Westplaat Buitengronden                           | 0           | (71)        | (142)       | (212)       | 283         | (388)       | (493)       | (598)       | 703         | (590)       | (476)       | authors                   |
| Beeninger Slikken                                 | 23          | 33          | 16          | 13          | 14          | (18)        | (17)        | 31          | 31          | (31)        | (31)        | Kuijpers & van der Heiden |
| Tiengemetten<br>eilanden Ventjagersplaten         | 10          | 76          | 67          | 130         | 246         | 224         | 367         | 298         | 360         | 591         | 575         | DPM                       |
| Hellegatsplaten, Ooltgensplaateland, lange eiland | 146         | 176         | 250         | 239         | 236         | 236         | 274         | 166         | 209         | 192         | 143         | DPM                       |
| Hellegatsplaten, other                            | 372         | 360         | 347         | 378         | (373)       | (373)       | (433)       | (263)       | (331)       | (304)       | (226)       | authors                   |
| Krib Hellegat / Banaan                            | 260         | 375         | (309)       | 242         | 251         | 393         | 347         | 275         | 360         | 473         | (473)       | DPM                       |
| Noordplaat, Volkerrakmeer                         | 267         | 252         | (251)       | 250         | 512         | 928         | 514         | 560         | 757         | 780         | (780)       | DPM                       |
| <b>total excluding interpolated counts</b>        | <b>2097</b> | <b>2573</b> | <b>2694</b> | <b>2719</b> | <b>3240</b> | <b>3872</b> | <b>3606</b> | <b>3262</b> | <b>4161</b> | <b>3422</b> | <b>2205</b> |                           |
| <b>total including interpolated counts</b>        | <b>2097</b> | <b>2644</b> | <b>3395</b> | <b>2931</b> | <b>3613</b> | <b>4676</b> | <b>4599</b> | <b>4123</b> | <b>4598</b> | <b>4485</b> | <b>4192</b> |                           |

1: Numbers in brackets interpolated

2: Numbers in brackets interpolated, last year(s) assumed the same as year before

3: Numbers assumed proportional to other part of this colony

4: Numbers in 2011-2014 are incomplete

**Table S2** The ten best-fitting models for survival of barnacle geese in the Northern Delta area Netherlands. Models consider survival (S), resighting probability (P), reporting probability (r) and the fidelity parameter (F). Parameters are modelled as a function of time (year) and age. For further analyses, parameter estimates for S and r were chosen from model 4

| Model                                                 | npar | AICc    | $\Delta$ AICc | Weging | Deviance |
|-------------------------------------------------------|------|---------|---------------|--------|----------|
| 1 S(time),P(time)r(.),F(time + age)                   | 33   | 7089,14 | 0,0000        | 0,2947 | 1265,38  |
| 2 S(time),P(time),r(age),F(time + age)                | 34   | 7089,41 | 0,2689        | 0,2576 | 1263,62  |
| 3 S(time),P(time),r(time),F(time + age)               | 43   | 7089,43 | 0,2880        | 0,2552 | 1245,34  |
| 4 S(time + age),P(time),r(time),F(time + age)         | 44   | 7092,46 | 3,3169        | 0,0561 | 1246,33  |
| 5 S(time),P(time),r(time + age),F(time + age)         | 44   | 7092,80 | 3,6631        | 0,0472 | 1246,67  |
| 6 S(time + age),P(time),r(time + age),F(time)         | 44   | 7095,12 | 5,9785        | 0,0148 | 1248,99  |
| 7 S(time + age),P(time),r(time),F(time)               | 43   | 7095,13 | 5,9945        | 0,0147 | 1251,04  |
| 8 S(time + age),P(time),r(time + age),F(.)            | 35   | 7095,98 | 6,8406        | 0,0096 | 1268,16  |
| 9 S(time + age),P(time),r(time),F(age)                | 35   | 7096,39 | 7,2500        | 0,0079 | 1268,57  |
| 10 S(time + age),P(time),r(time + age),F(~time + age) | 45   | 7096,43 | 7,2940        | 0,0077 | 1248,26  |
